# Supplementary material for: Atypical and classical memory B cells produce Plasmodium falciparum neutralizing antibodies
Source: PubMed Central journal article supplement — J Exp Med. 2013 Feb 11;210(2):389–99. doi: 10.1084/jem.20121970 (PMC3570107; doi:10.1084/jem.20121970), 2013-02-11
Supplement: supp_jem.20121970_JEM_20121970_sm.pdf [file supp_jem.20121970_JEM_20121970_sm.pdf]

**Table S1.** Study participant blood count

| Donor | Sex | Age | Parasitemia | Paracheck | STEVOR<br>PCR | Part. | HIV/Hep. | WBC         | RBC         | HGB         | HCT  | MCV       | MCH       | MCHC        | RDW  |
|-------|-----|-----|-------------|-----------|---------------|-------|----------|-------------|-------------|-------------|------|-----------|-----------|-------------|------|
|       |     |     | <i>p/μl</i> |           |               |       |          | $10^3/mm^3$ | $10^6/mm^3$ | <i>g/dl</i> | %    | $\mu m^3$ | <i>pg</i> | <i>g/dl</i> | %    |
| MP036 | M   | 30  | 78          | +++       | +             | No    | No       | 13.7        | 4.54        | 13.0        | 40.9 | 90        | 28.5      | 31.6        | 13.4 |
| MP070 | M   | 28  | 0           | –         | +             | No    | No       | 38.0        | 4.36        | 13.2        | 39.9 | 91        | 30.3      | 33.2        | 11.7 |
| MP071 | M   | 40  | 0           | –         | +             | No    | No       | 30.8        | 4.60        | 15.1        | 45.6 | 99        | 32.7      | 33.0        | 10.7 |

Part., participation in vaccine trial study; HIV/Hep., Known HIV/Hep. infection; WBC, white blood cell; HGB, hemoglobin; HCT, hematokrit; MCV, mean corpuscular volume; MCH, mean corpuscular hemoglobin; MCHC, MCH conc.; RDW, red cell distribution width.
